# Supplementary material for: Analysis of heterogeneous dengue transmission in Guangdong in 2014 with multivariate time series model
Source: PubMed Central journal article supplement (PMC5036033; doi:10.1038/srep33755), 2016-09-26
Supplement: srep33755-s1.pdf [file srep33755-s1.pdf]

## SUPPLEMENTARY INFORMATION

### **Analysis of heterogeneous dengue transmission in Guangdong in 2014 with multivariate time series model**

Qing Cheng<sup>1,2,\*</sup>, Xin Lu<sup>2,3,4,5</sup>, Joseph T. Wu<sup>6</sup>, Zhong Liu<sup>1,2</sup>, Jincai Huang<sup>1,2</sup>

<sup>1</sup> Science and Technology on Information Systems Engineering Laboratory, National University of Defense Technology, 410073 Changsha, China

<sup>2</sup> College of Information System and Management, National University of Defense Technology, 410073 Changsha, China

<sup>3</sup> Flowminder Foundation, 17177 Stockholm, Sweden

<sup>4</sup> Department of Public Health Sciences, Karolinska Institutet, 17177 Stockholm, Sweden

<sup>5</sup> Division of Infectious Disease, Key Laboratory of Surveillance and Early-Warning on Infectious Disease, Chinese Centre for Disease Control and Prevention, Beijing 102206, P. R. China

<sup>6</sup> School of Public Health, Li Kashing Faculty of Medicine, Hong Kong University, Hong Kong Special Administrative Region, China

\*Corresponding author: [sgggps@163.com](mailto:sgggps@163.com)

Table S1. Shows the mean scores based on one-step-ahead predictions. Model D3 is compared with the remaining models; the Monte Carlo p-values are based on permutation tests for paired observations (9999 permutations). Bold indicates the best model, i.e. the model with the lowest score

| Model                     | S        | $\overline{\log S}$ | (p-value) | $\overline{RPS}$ | (p-value) |
|---------------------------|----------|---------------------|-----------|------------------|-----------|
| With Fo weight model      |          |                     |           |                  |           |
| A1                        | 1        | 1.638               | (0.0796)  | 5.542            | (0.0071)  |
| A2                        | 2        | 1.611               | (0.0766)  | 6.158            | (0.0081)  |
| A3                        | 3        | 1.595               | (0.0573)  | 5.232            | (0.0076)  |
| With Fo+pop. weight model |          |                     |           |                  |           |
| B1                        | 1        | 1.650               | (0.0801)  | 5.748            | (0.0074)  |
| B2                        | 2        | 1.610               | (0.0909)  | 6.168            | (0.0085)  |
| B3                        | 3        | 1.589               | (0.0599)  | 5.197            | (0.0076)  |
| With PL weight model      |          |                     |           |                  |           |
| C1                        | 1        | 1.599               | (0.1451)  | 5.644            | (0.0091)  |
| C2                        | 2        | 1.569               | (0.0215)  | 5.226            | (0.0076)  |
| C3                        | 3        | 1.524               | (0.1066)  | 1.509            | (0.7993)  |
| With PL+pop. weight model |          |                     |           |                  |           |
| D1                        | 1        | 1.599               | (0.1424)  | 5.665            | (0.007)   |
| D2                        | 2        | 1.574               | (0.0154)  | 5.347            | (0.0081)  |
| <b>D3</b>                 | <b>3</b> | <b>1.520</b>        |           | <b>1.506</b>     |           |
